# Supplementary figures and images for: Abnormal Expression of N6-Methyladenosine RNA Methylation Regulator IGF2BP3 in Colon Cancer Predicts a Poor Prognosis
Source: Hindawi journal article supplement (doi:10.1155/2022/5883101), 2022-05-30

Gender Female Male

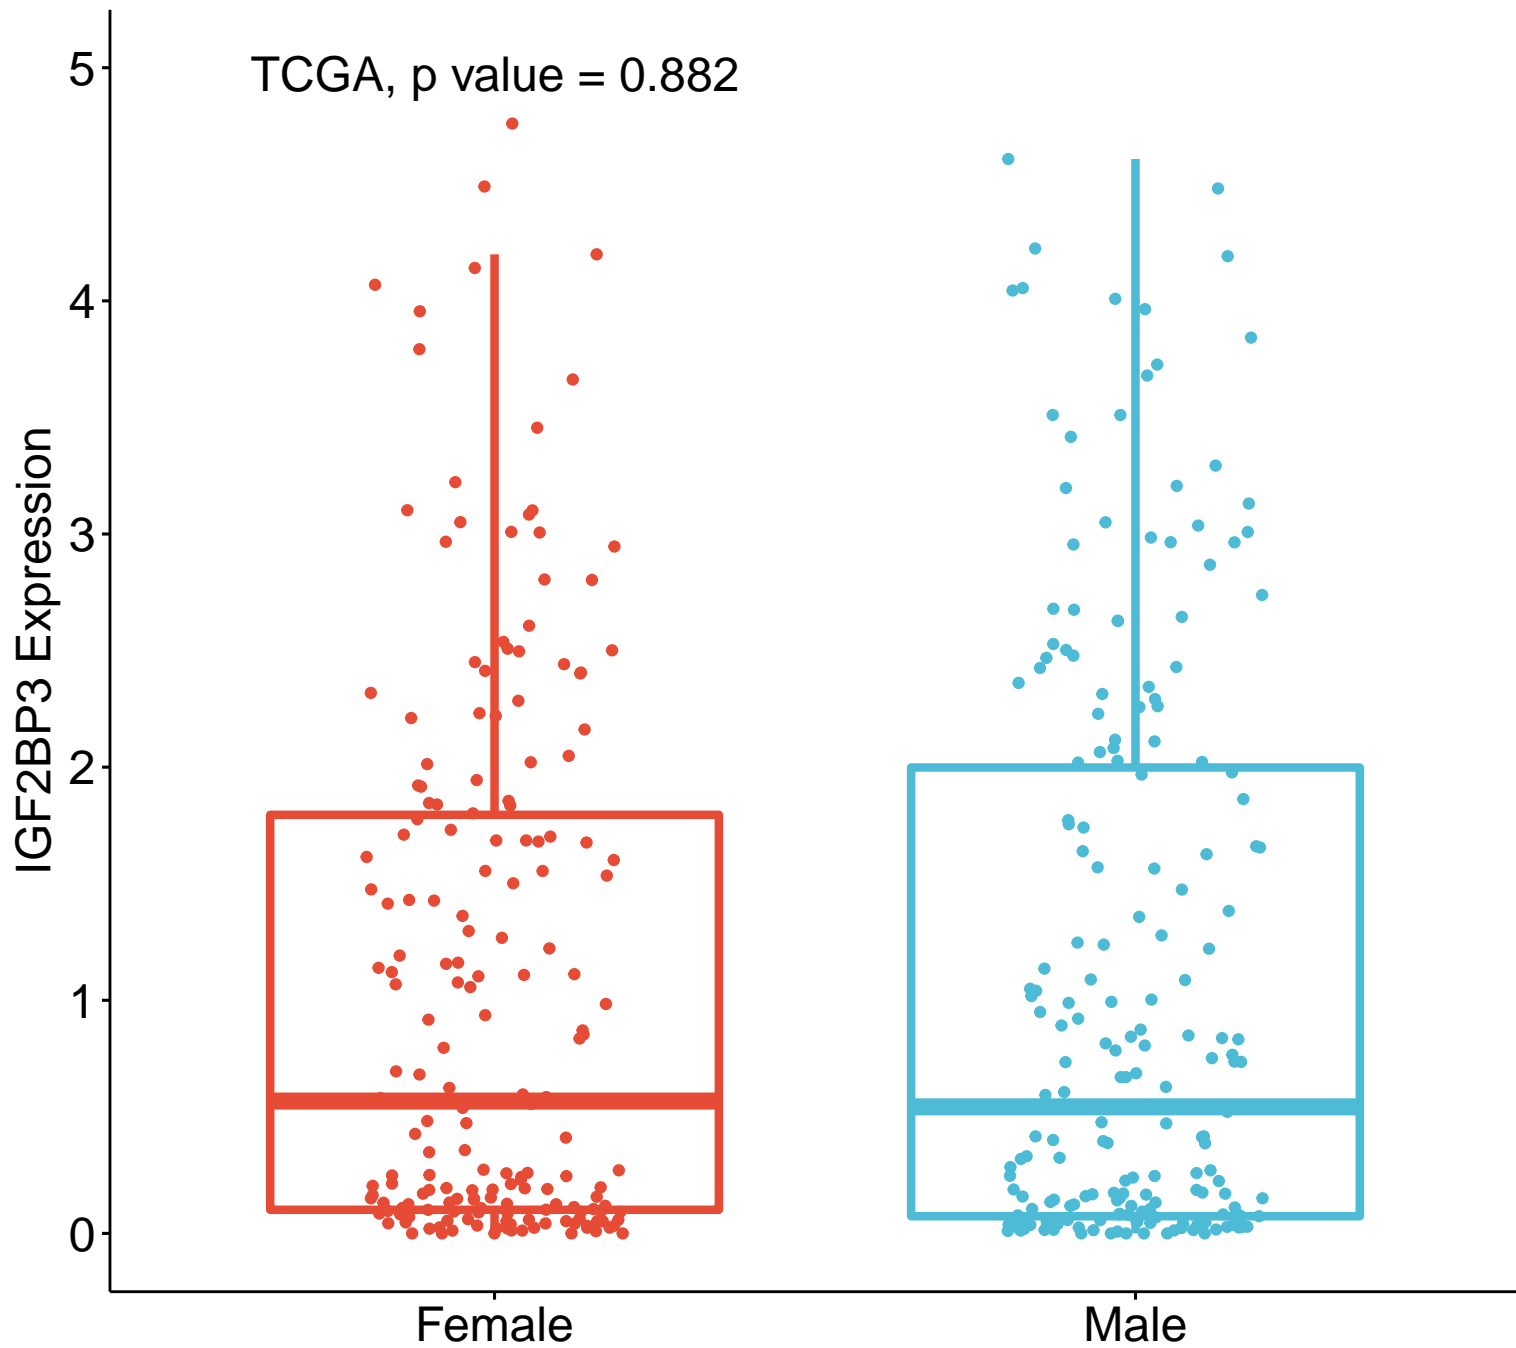

Supplement: f1 [file 5883101.f1.zip]

Age  <60  >=60

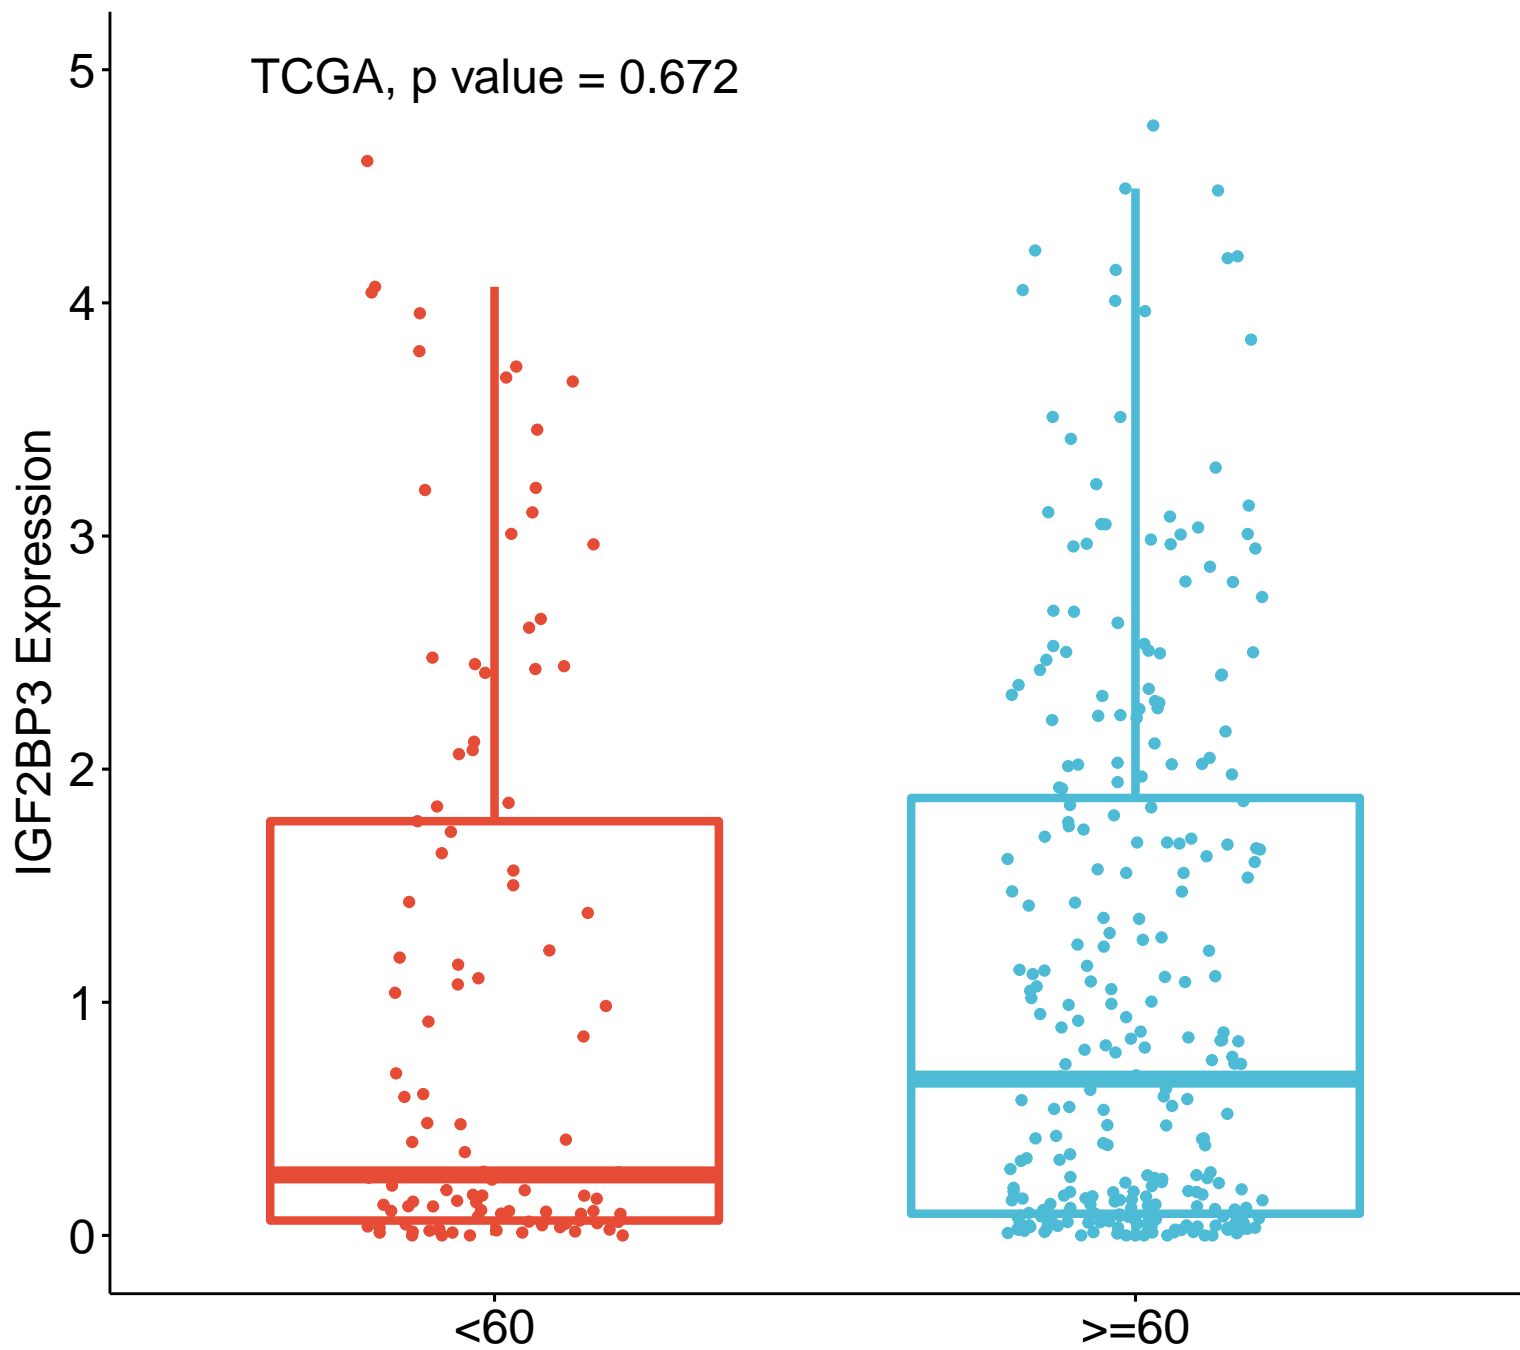

Supplement: f1 [file 5883101.f1.zip]

N  N0  N1-2

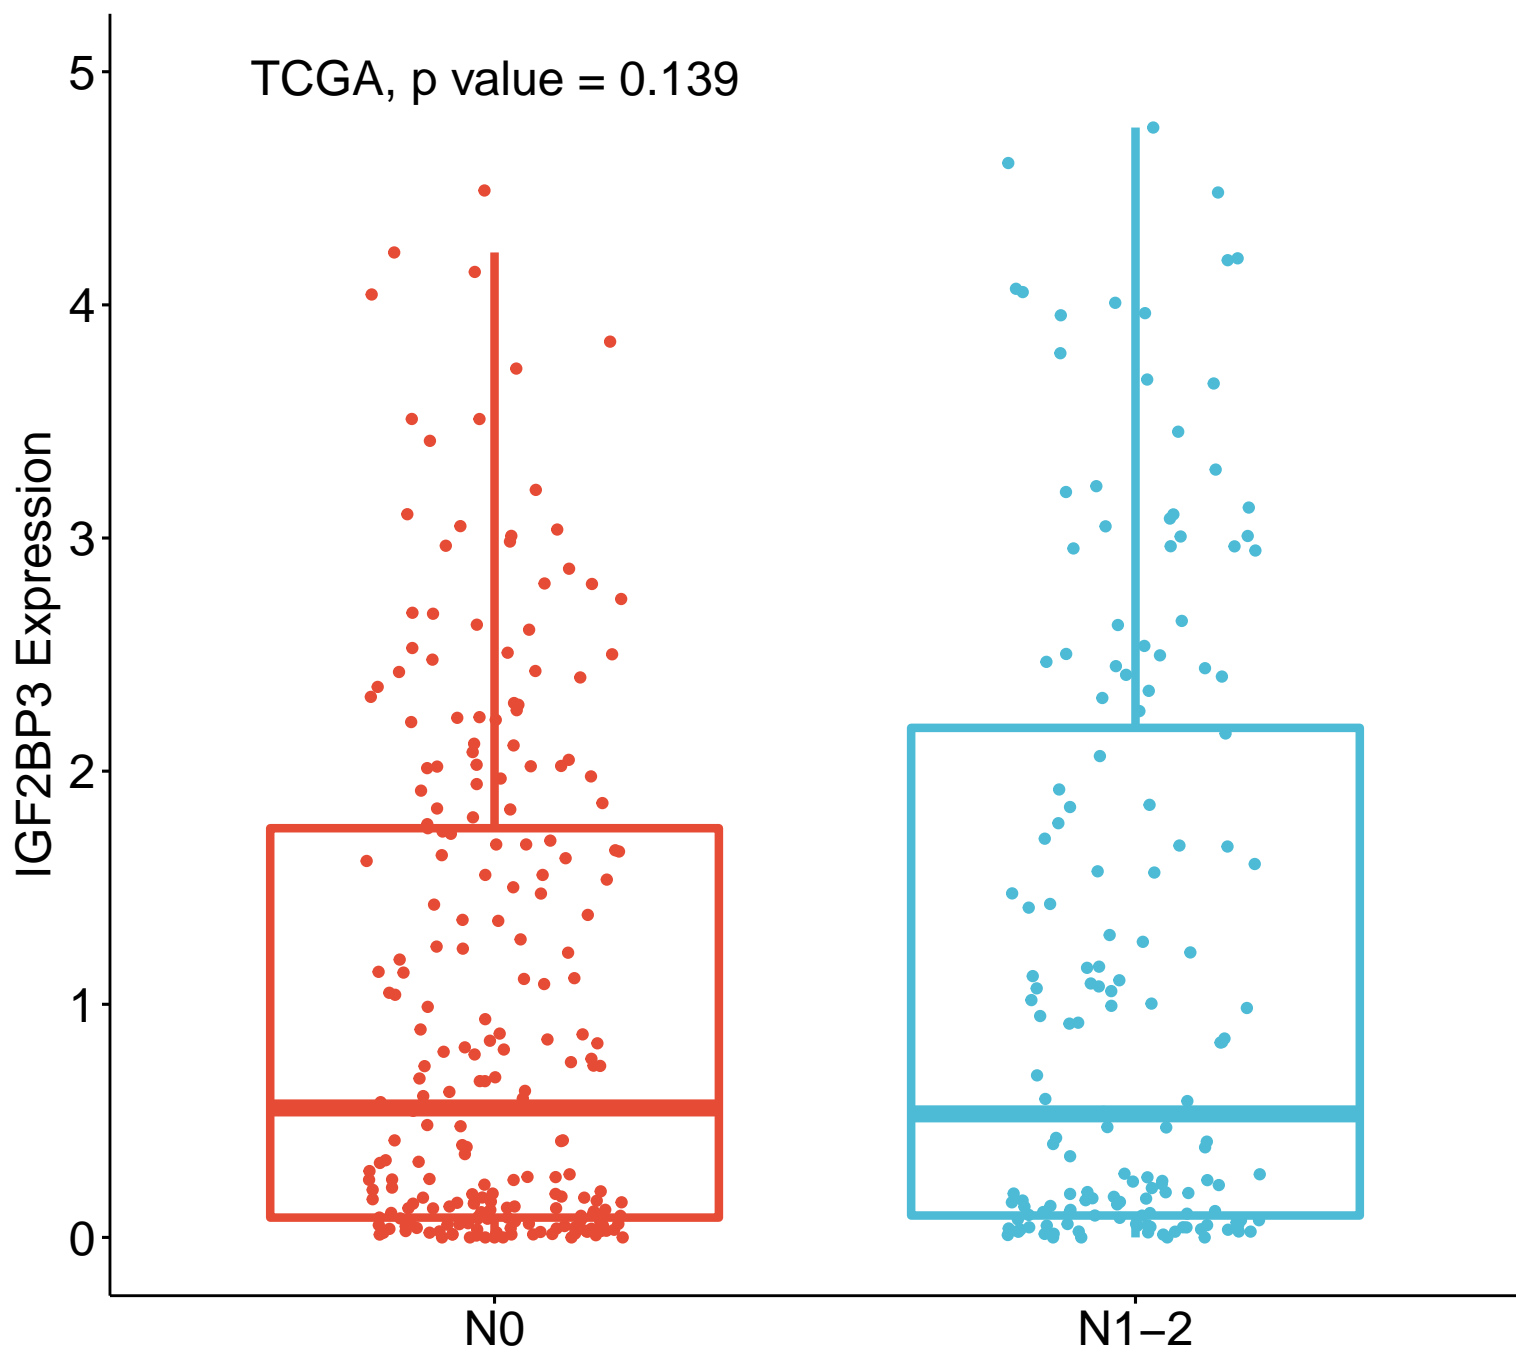

Supplement: f1 [file 5883101.f1.zip]

Stage  Stage I & Stage II  Stage III & Stage IV

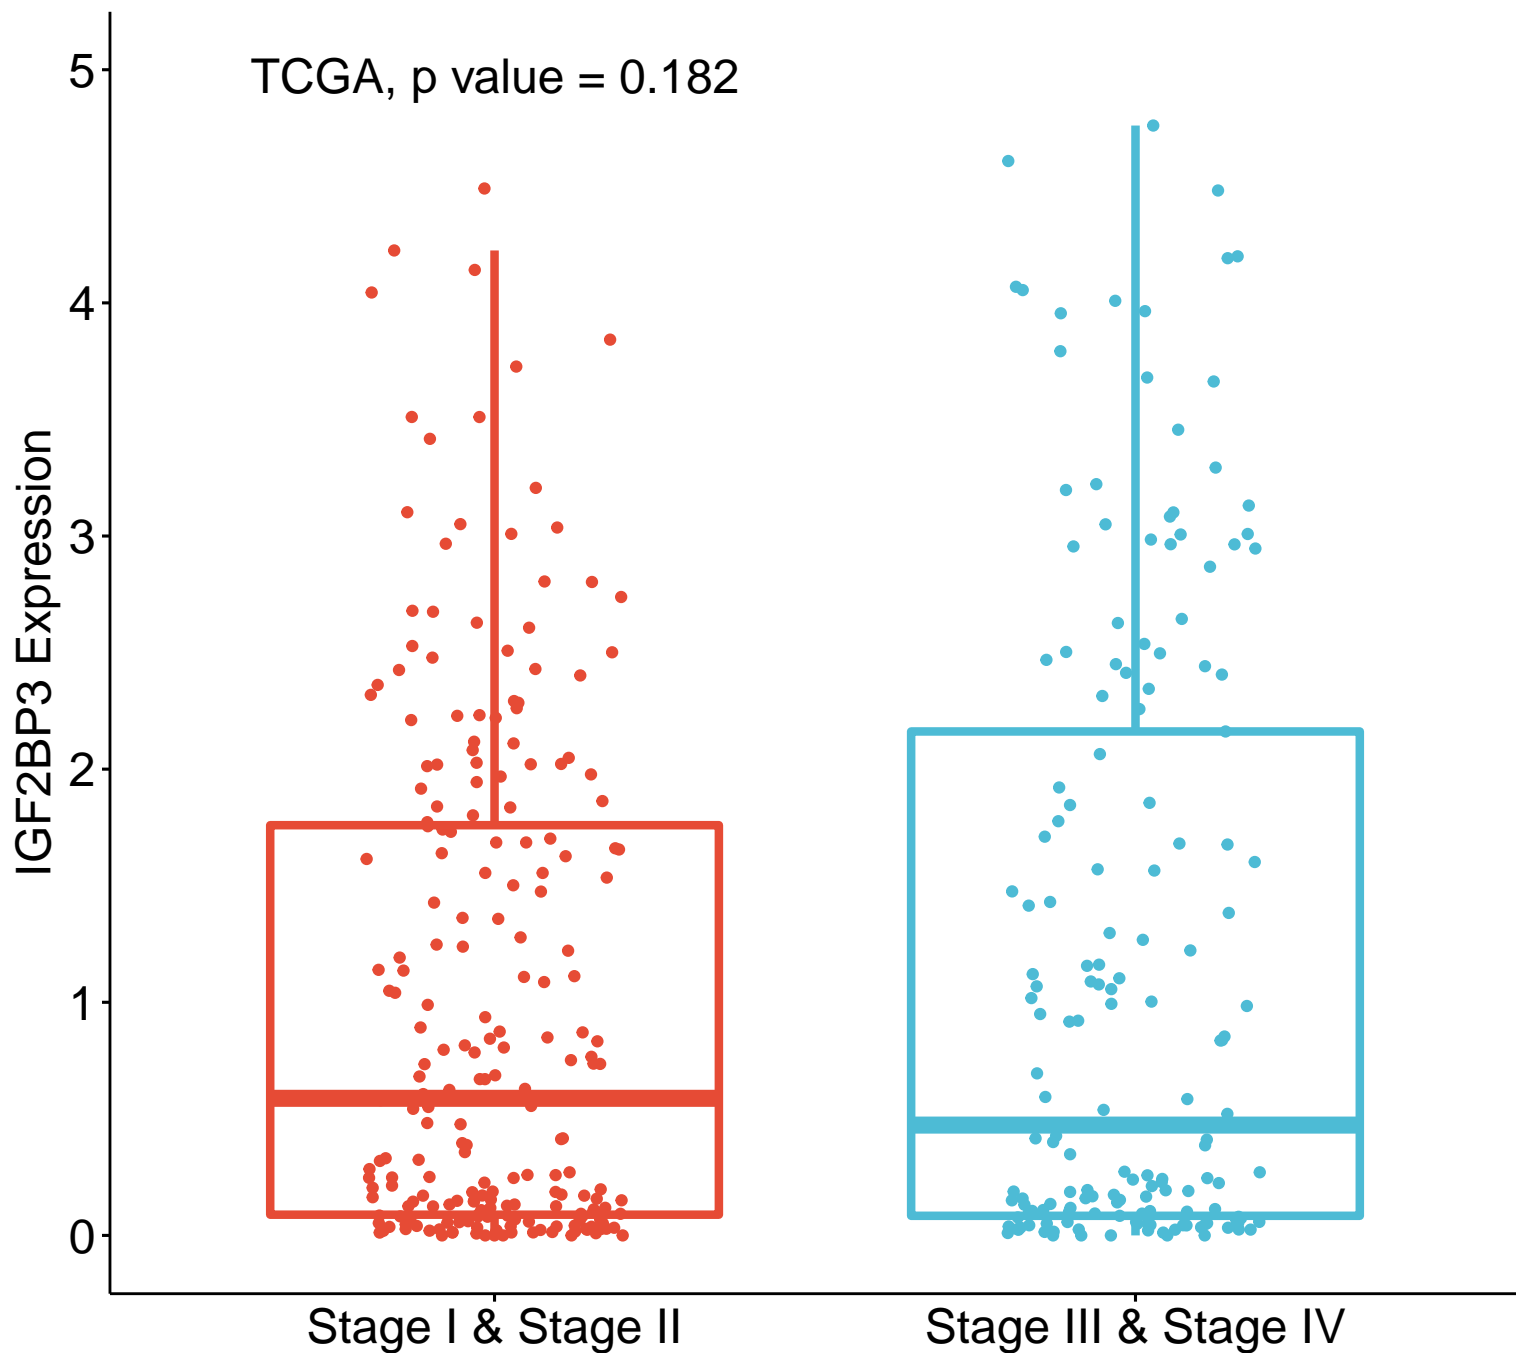

Supplement: f1 [file 5883101.f1.zip]

M M0 M1

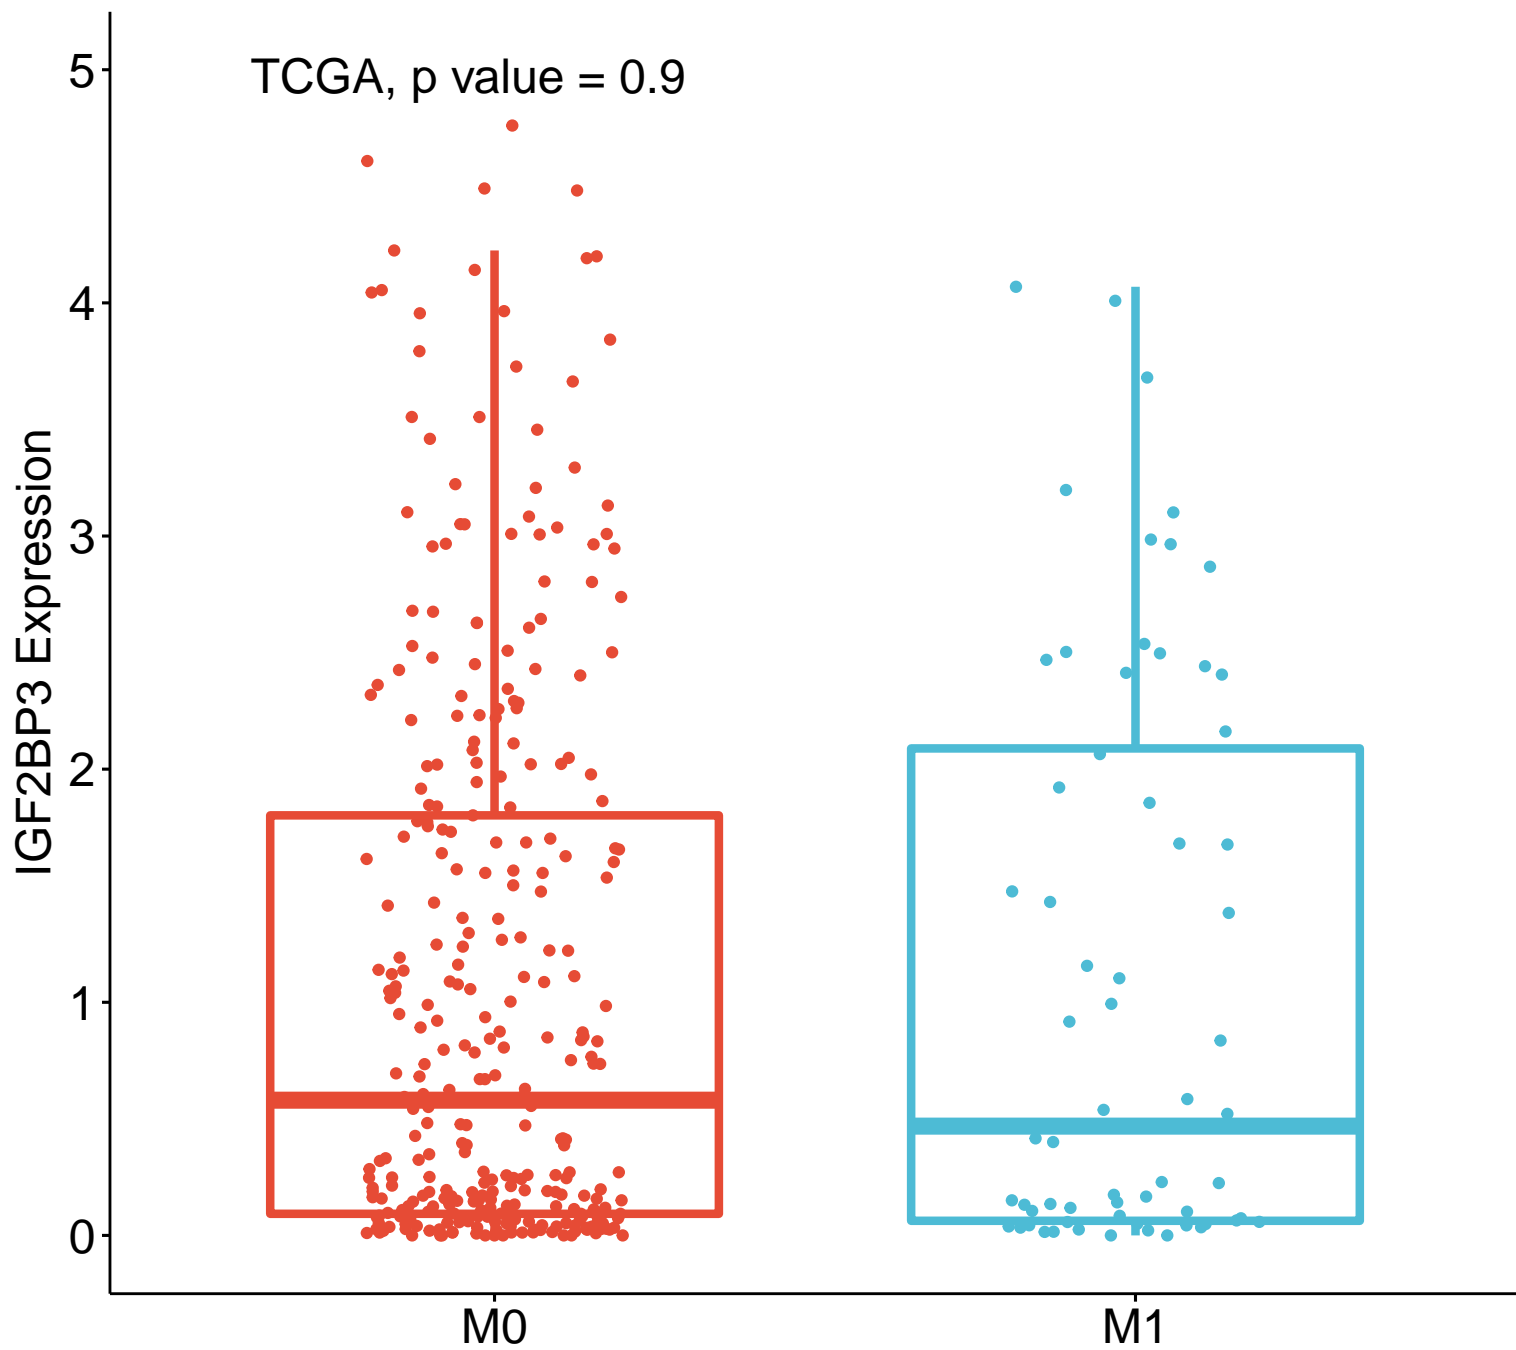

Supplement: f1 [file 5883101.f1.zip]

T T1-2 T3-4

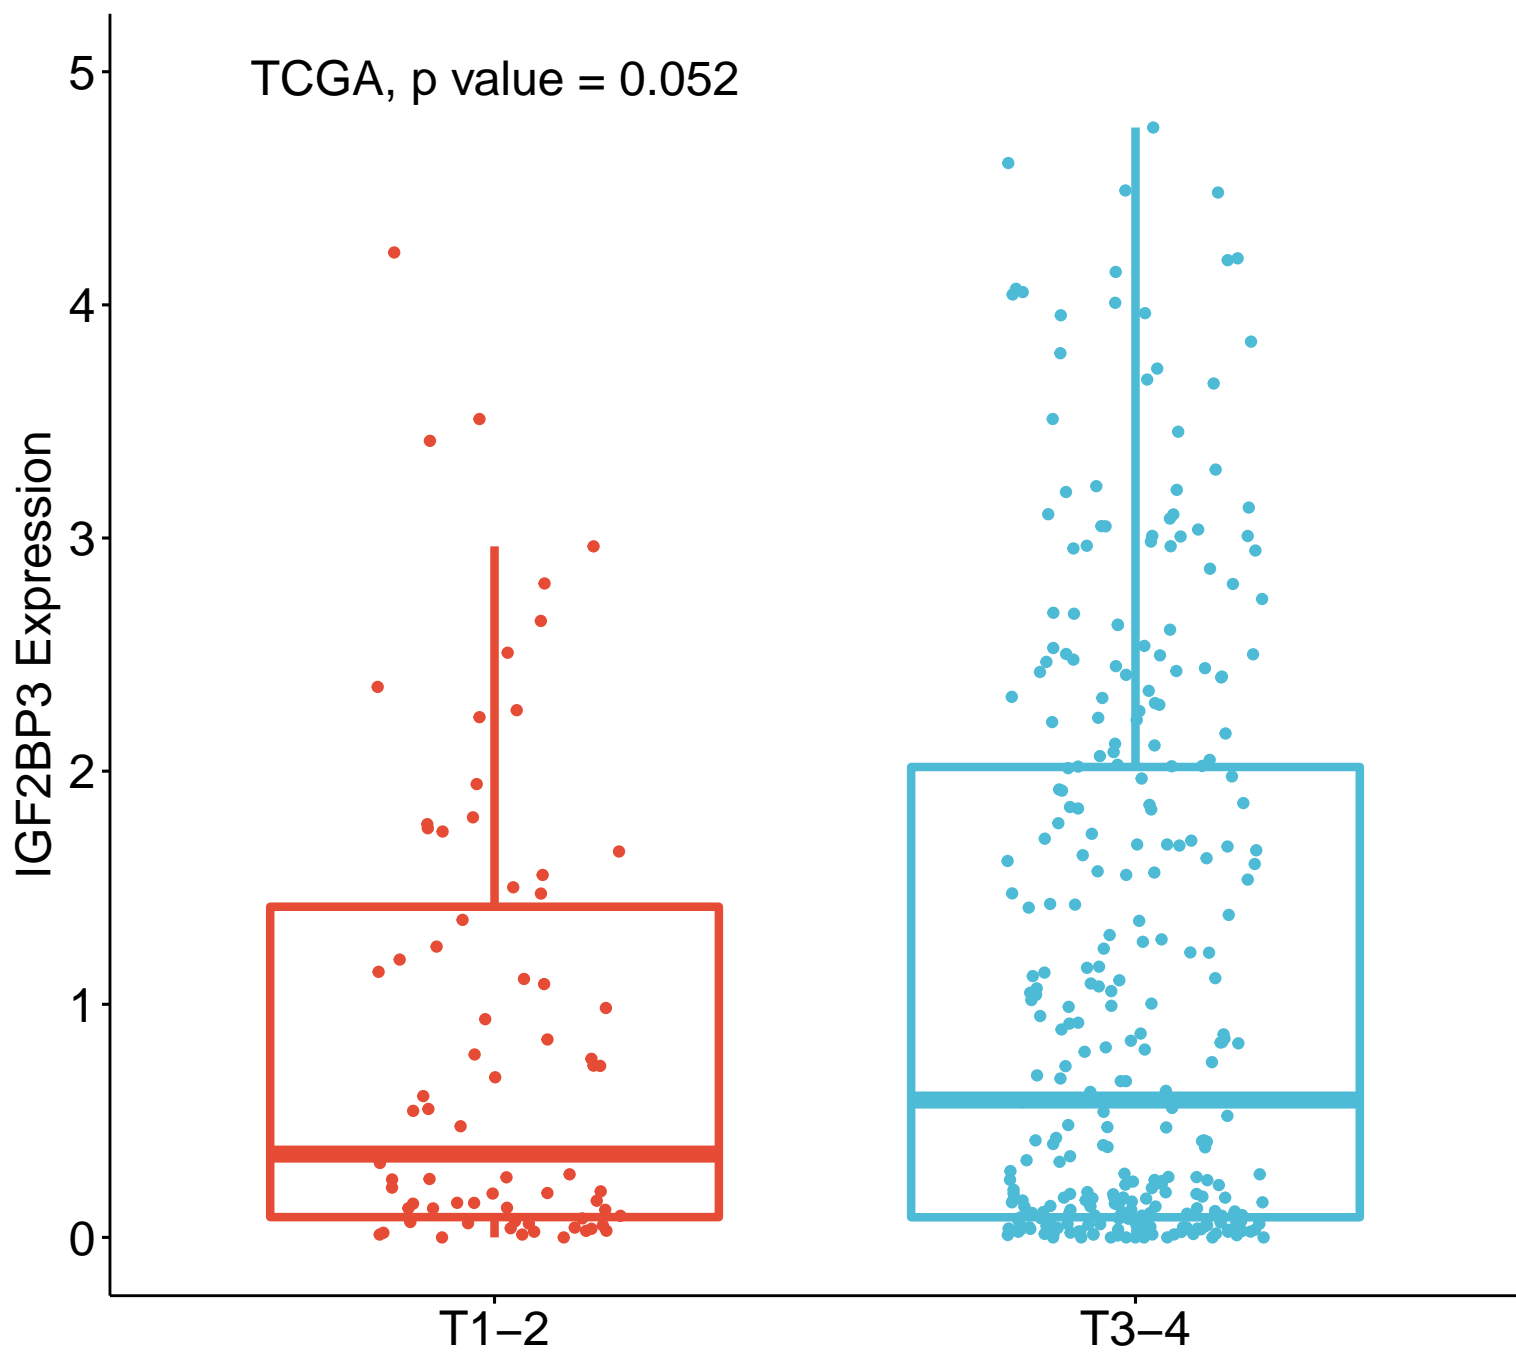

Supplement: f1 [file 5883101.f1.zip]

CA19.9  High CA19-9  Low CA19-9

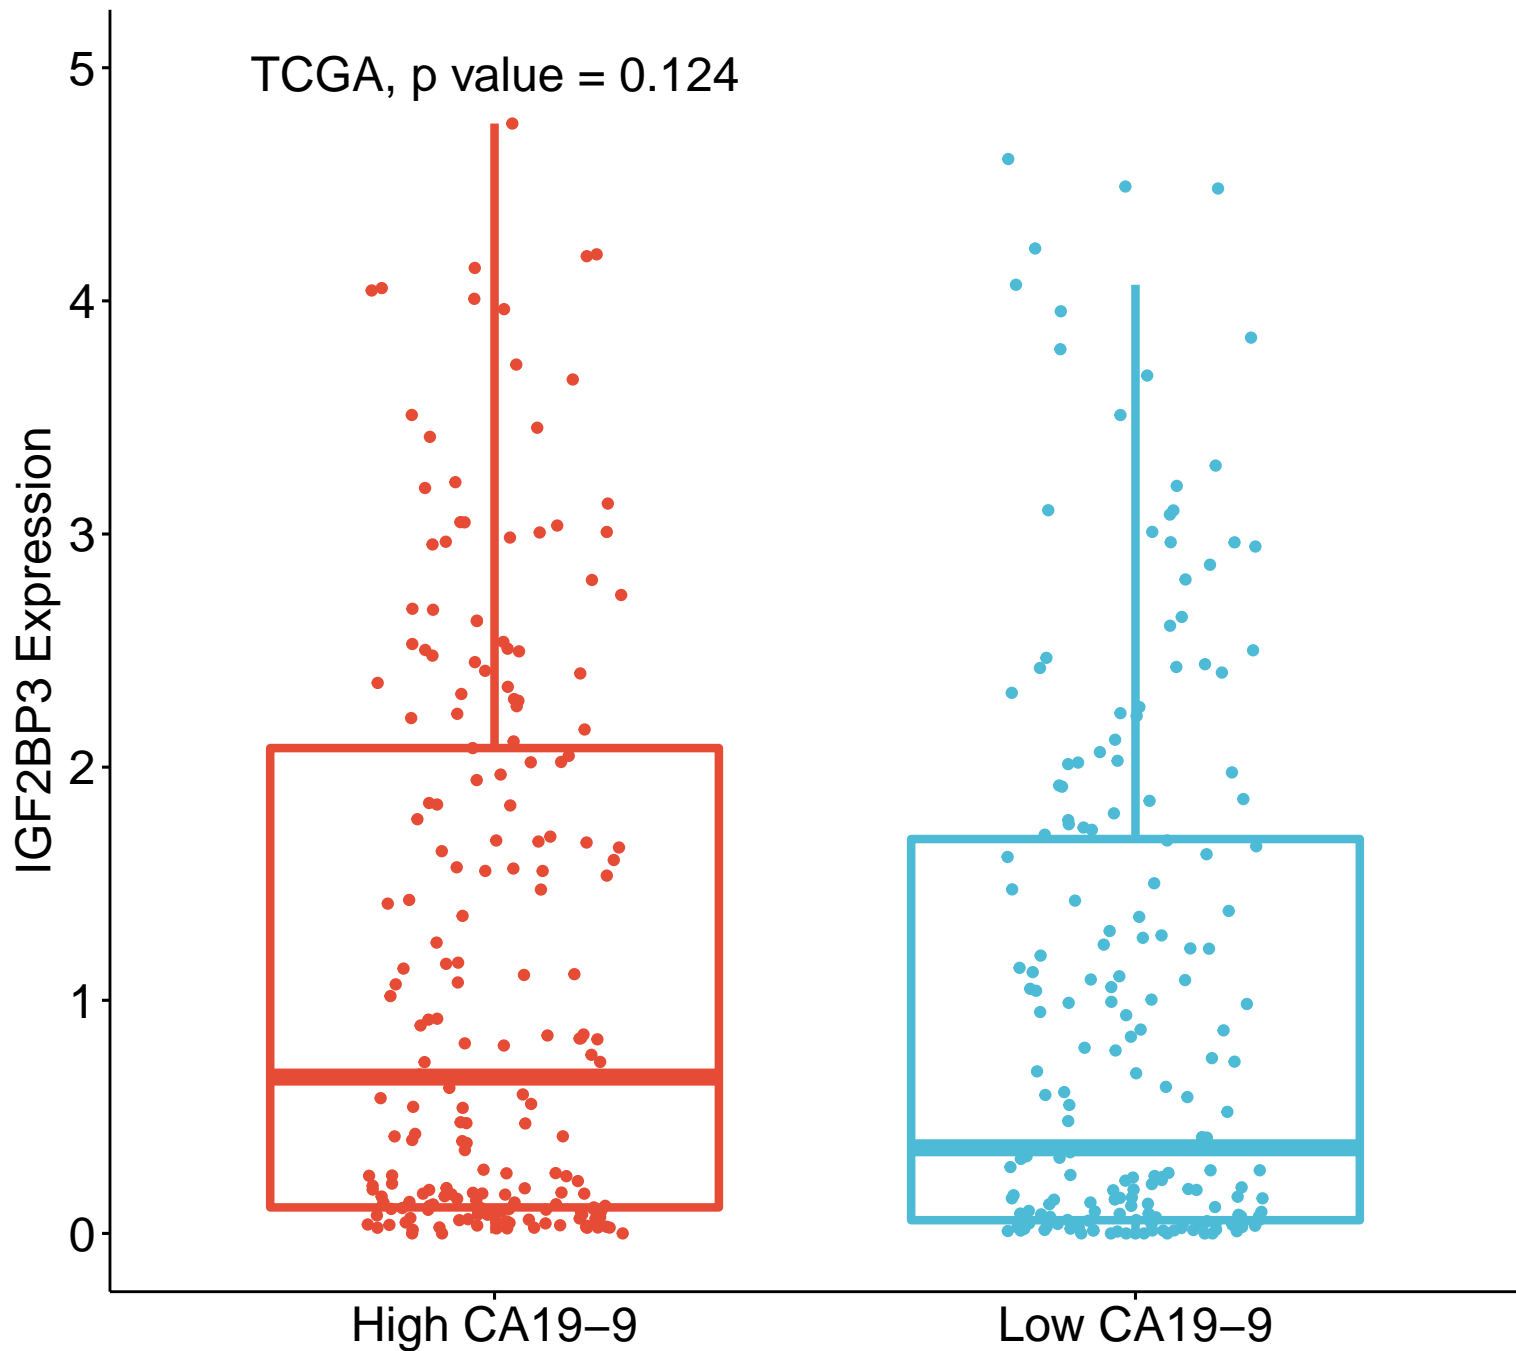

Supplement: f1 [file 5883101.f1.zip]

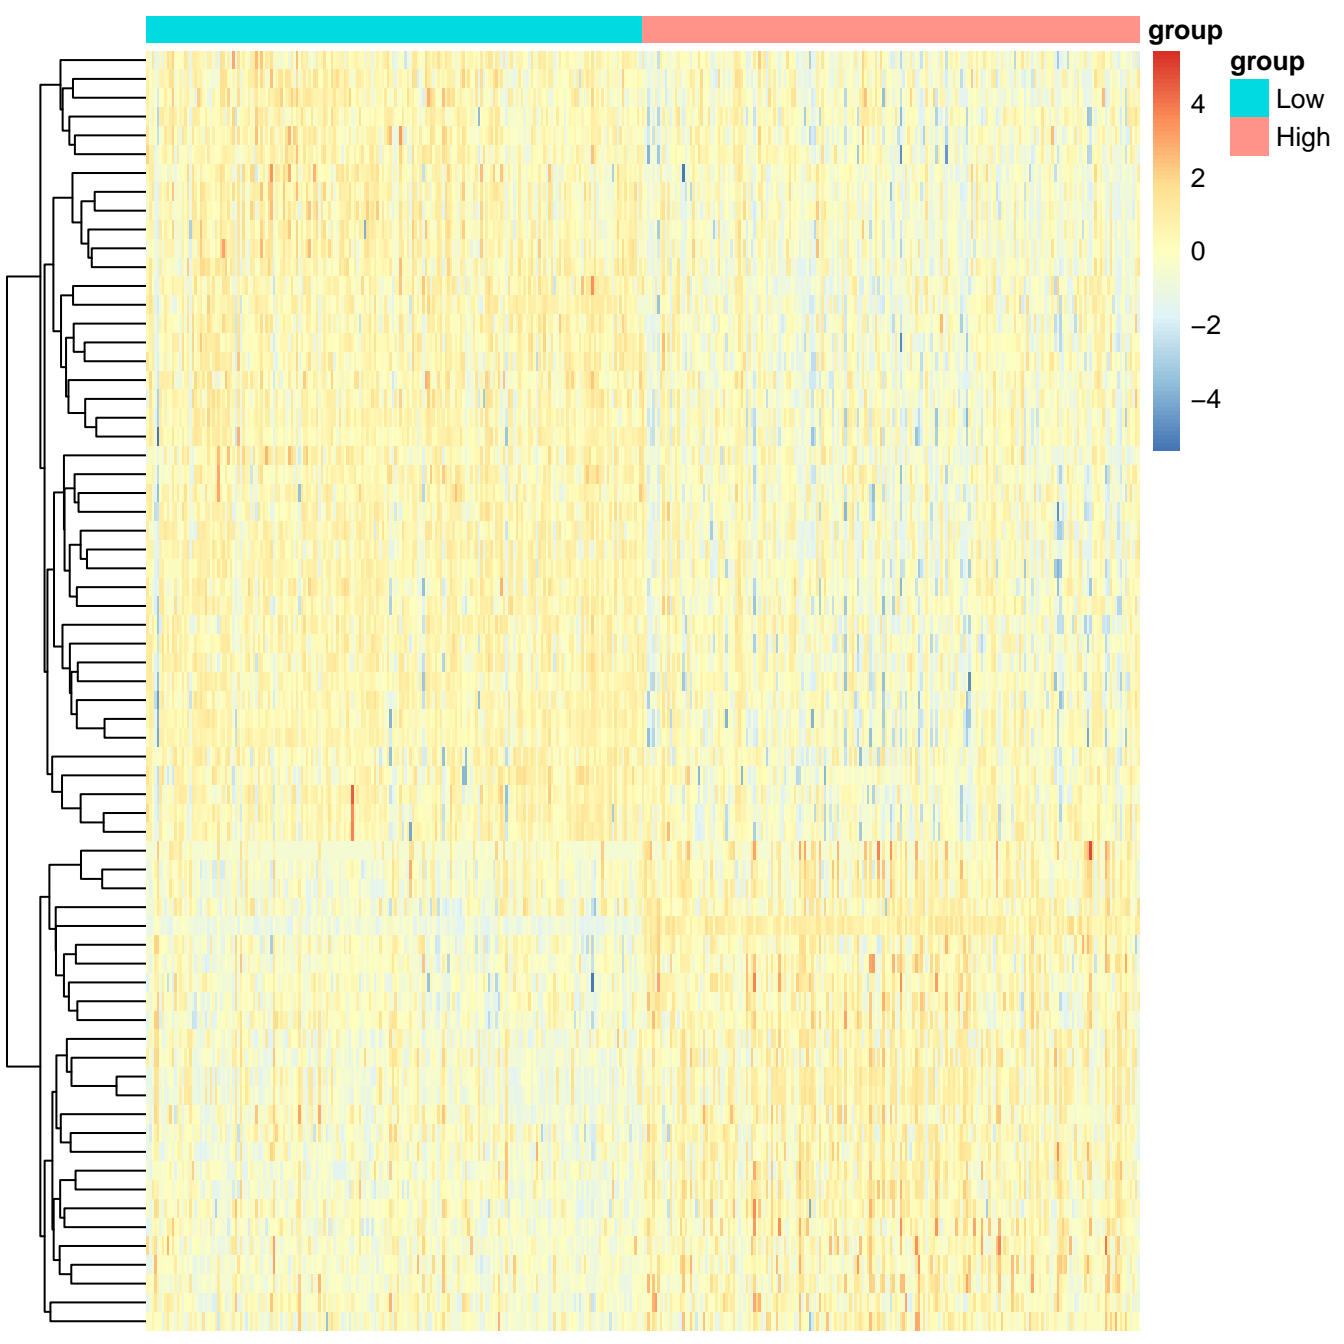

Supplement: f1 [file 5883101.f1.zip]
